# Supplementary material
Source: publisher figshare collection journal article supplement (https://future-science-group.figshare.com/ndownloader/files/28008753)
Supplement: Supplementary file 1 [file 28008753]

# Supplemental table 1. Treatment response in T790M positive and T790M negative patients

|  | **T790M+** | | **T790M-** | | **OR** | **95%CI** | | ***p*** |
| --- | --- | --- | --- | --- | --- | --- | --- | --- |
|  | **N** | **%** | **N** | **%** |  |  |
| **Best response** |  |  |  |  |  |  |  |  |
| CR | 2 | 2.0 | 0 | 0 |  |  |  |  |
| PR | 61 | 60.4 | 18 | 47.4 |  |  |  |  |
| SD | 18 | 17.8 | 11 | 28.9 |  |  |  |  |
| PD | 15 | 14.9 | 9 | 23.7 |  |  |  |  |
| Missing | 5 | 4.9 | 0 | 0 |  |  |  |  |
| **ORR** |  | 62.4 |  | 47.4 | 2.121 | 0.989 | 4.551 | 0.080 |
| CR+PR | 63 | 62.4 | 18 | 47.4 |  |  |  |  |
| SD+PD | 33 | 37.6 | 20 | 52.6 |  |  |  |  |
| **DCR** |  | 80.2 |  | 76.3 | 1.676 | 0.662 | 4.234 | 0.397 |
| CR+PR+SD | 81 | 80.2 | 29 | 76.3 |  |  |  |  |
| PD | 15 | 19.8 | 9 | 23.7 |  |  |  |  |

OR, odds ratio, 95%CI, 95% confidence interval, CR, complete response, PR, partial response, SD, stable disease, PD, progressive disease, ORR, overall response rate, DCR, disease control rate
